# Supplementary material
Source: Royal Society of Chemistry journal article supplement (doi:10.1039/d6lp00009f)
Supplement: d6lp00009f1.pdf [file d6lp00009f1.pdf]

## Supporting Information

# Multi-dynamic bond reinforced polyurethane elastomer with outstanding damping characteristics and mechanical properties

*Shaolong Li<sup>a</sup>, Feng Qi<sup>a, b\*</sup>, Chunyang Di<sup>b</sup>, Yongpeng Yang<sup>a</sup>, Yang Zhao<sup>a</sup>, Yutong Li<sup>a</sup>, Hongjia Song<sup>a</sup>, Jinbin Wang<sup>a</sup>, Zhao Fu<sup>a\*</sup>, Xiangli Zhong<sup>a\*</sup>*

<sup>a</sup> *National-Provincial Laboratory of Special Function Thin Film Materials, School of Materials Science and Engineering, Xiangtan University, Xiangtan 411105, China*

<sup>b</sup> *Qingdao Green World New Material Technology Co., Ltd, Qingdao, 266100, China*

\*Corresponding authors: xlzhong@xtu.edu.cn (Xiangli Zhong), fuzhao@xtu.edu.cn (Zhao Fu), qifeng2001@126.com (Feng Qi)

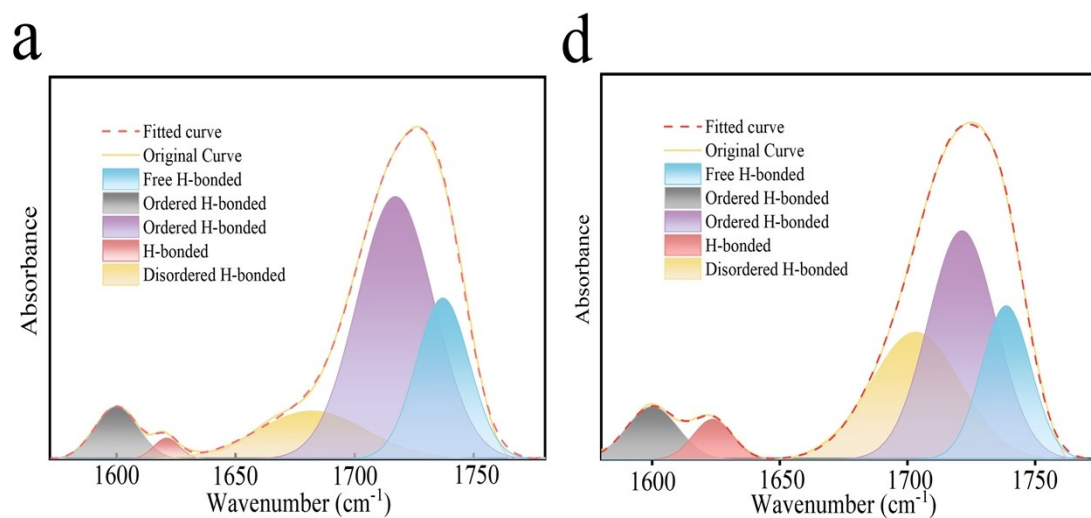

**Fig. S1** Peak fitting of the carbonyl peak: (a) PUE-TMP and (b) PUE-T-20SS

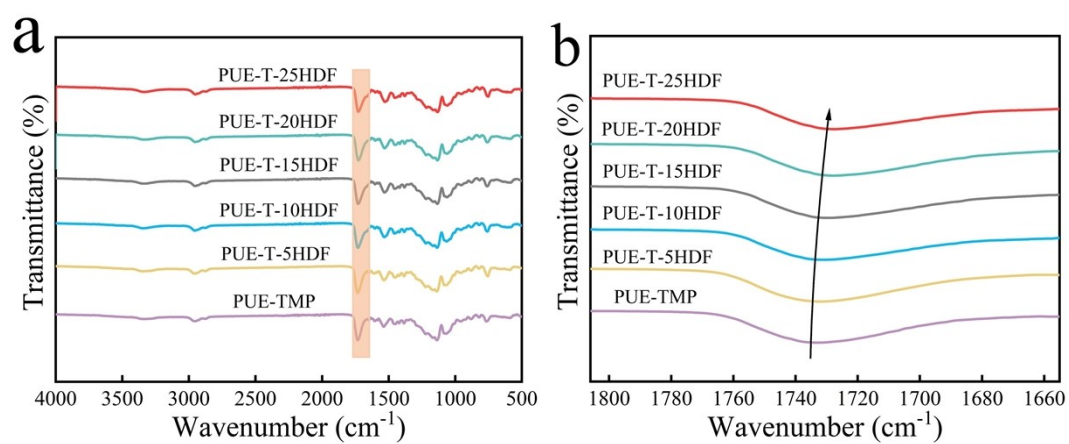

**Fig. S2** FTIR spectra of PUE-T-xHDF

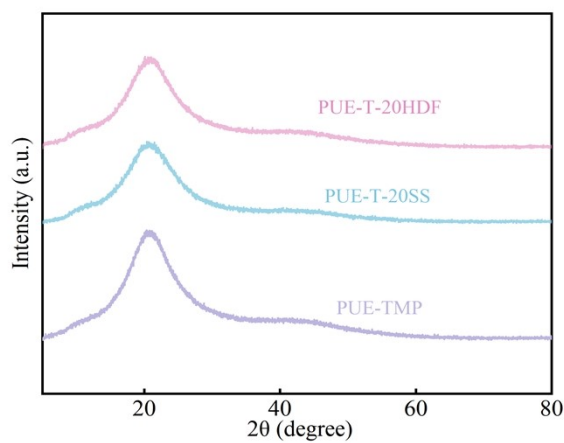

**Fig. S3** XRD pattern of PUE material

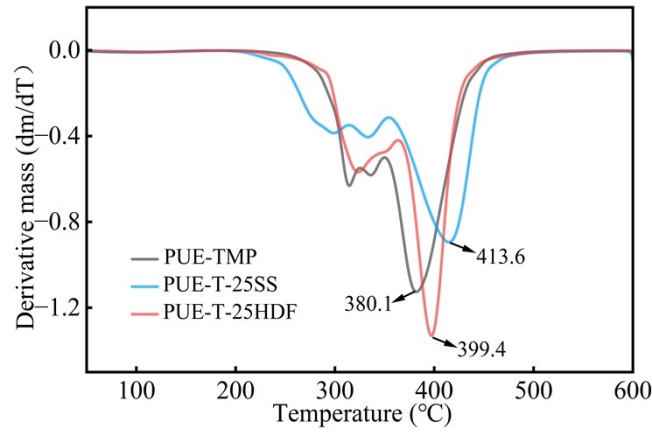

**Fig. S4** DTG Curves for Three PUE

**The calculation of  $\tan \delta$  area (TA).** The TA method can be used to comprehensively evaluate the damping performance of a material. The TA value refers to the area of the damping peak with a  $\tan \delta \geq 0.3$ , and The TA value is calculated as follows,

$$TA = \int_{T_2}^{T_1} \tan \delta dT$$

where  $\tan \delta$  is the loss factor,  $T_1$  and  $T_2$  are initial and final temperature of damping temperature range where  $\tan \delta$  is greater than or equal to 0.3.

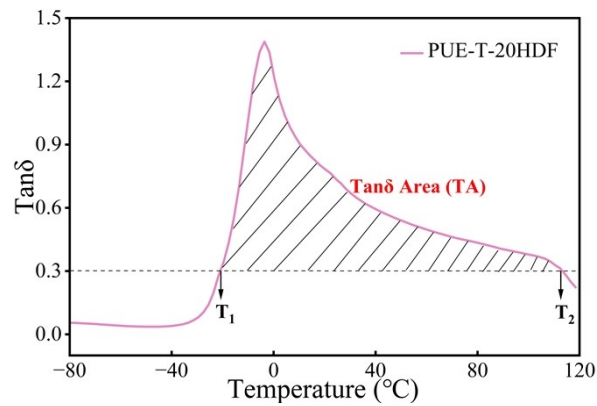

**Fig. S5** TA value of PUE-T-20HDF

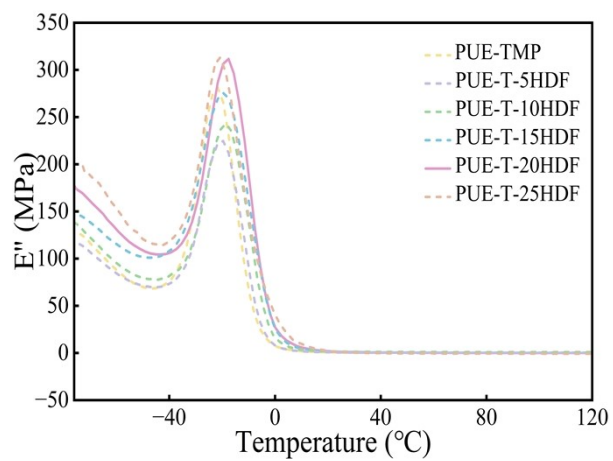

**Fig. S6** loss modulus curves of PUE-T-XHDF

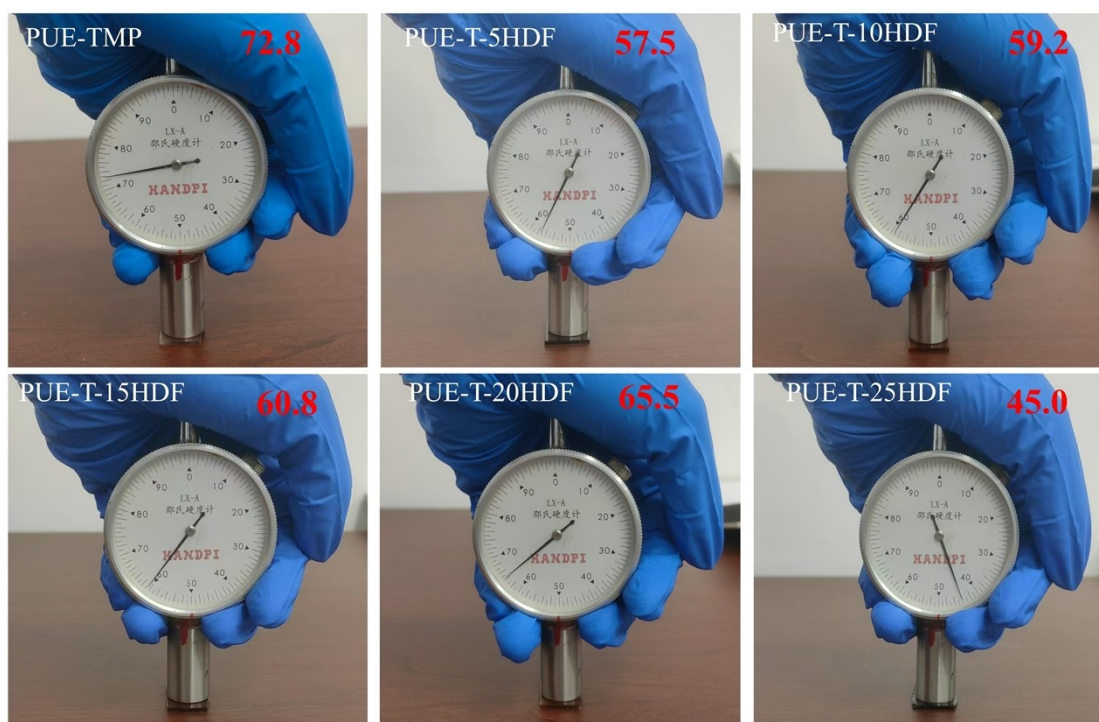

**Fig. S7** Effect of HDF content on hardness of the PUE composites

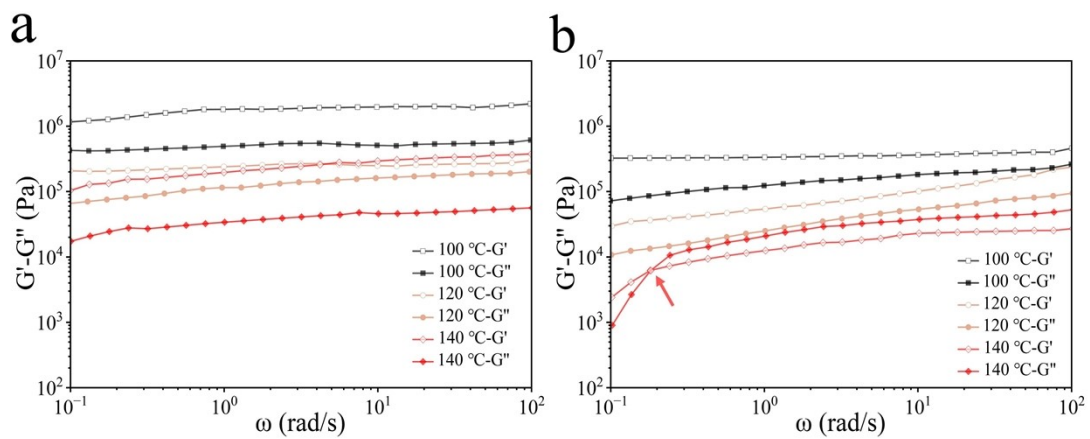

Fig. S8 Rheological Curves of (a)PUE-TMP and (b)PUE-T-20SS

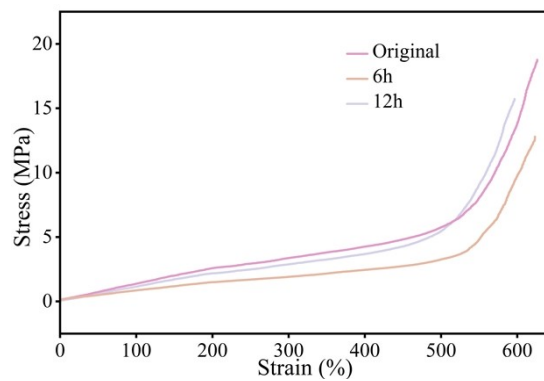

Fig. S9 Tensile strength recovery of PUE-T-20HDF after self-healing at 80 °C for 6 h and 12 h

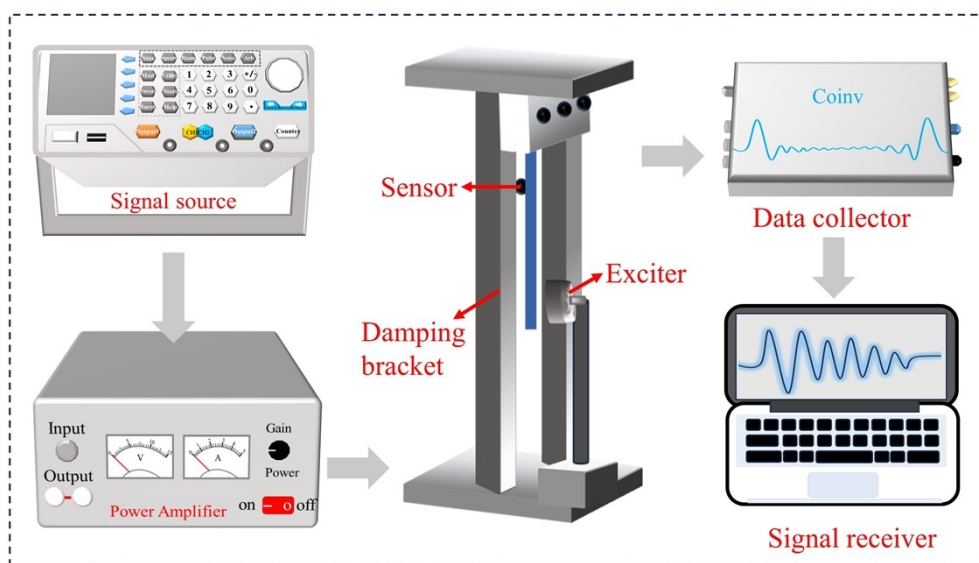

Fig. S10 Resonance Testing System

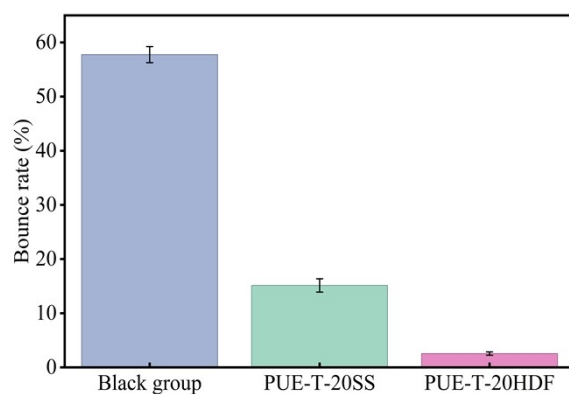

**Fig. S11** Comparison of Rebound Rates Among the Black group, PUE-T-20SS, PUE-T-20HDF

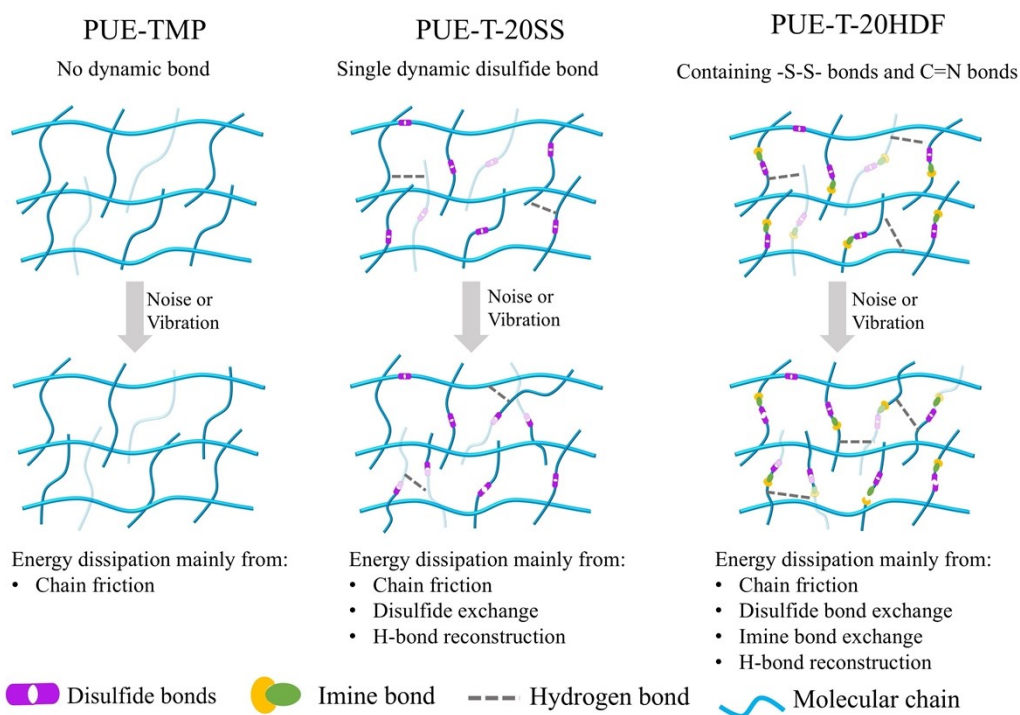

**Fig. S12** Comparison of the energy dissipation mechanisms of PUE-TMP, PUE-T-20SS, and PUE-T-20HDF

In this study, we first synthesized a prepolymer using 2,4-toluene diisocyanate (TDI, with a NCO mass fraction of 48.2%) and PEPA2000, controlling the NCO content of the prepolymer at 6%. In addition, the R value is defined as 0.9. (The R value represents the ratio of the number of moles of -NCO in the prepolymer to the number of moles of -OH in the chain extender, indicated as mol(-NCO)/mol(-OH)). Isophorone diisocyanate (IPDI, with a mass fraction of NCO of 37.5%) was then added to increase the total mass fraction of NCO in the mixture of prepolymer and IPDI from 6% to 8%. The mixing ratio was calculated using the following formula:

$$\frac{0.06 \times m_T + 0.375 \times m_I}{m_T + m_I} = 0.08$$

where  $m_T$  is the mass of the prepolymer added, and  $m_I$  is the mass of the IPDI added.

Since the total NCO molarity has increased, to maintain  $R = 0.9$ , the -OH molarity of the chain extender (HDF+TMP) should be increased proportionally, i.e., recalculated based on the new total NCO molarity.

Under the above conditions, A series of PUE materials was synthesized by controlling the ratio of two chain extenders (HDF and TMP).

**Table S1:** Specific Experimental Formula Parameters for PUE Synthesis

| Sample      | Prepolymer/g | HDF/g | TMP/g | IPDI/g | 2-DAPS/g |
|-------------|--------------|-------|-------|--------|----------|
| PUE-TMP     | 40           | 0     | 4.04  | 2.71   | 0        |
| PUE-T-5HDF  | 40           | 1.05  | 3.84  | 2.71   | 0        |
| PUE-T-10HDF | 40           | 2.10  | 3.63  | 2.71   | 0        |
| PUE-T-15HDF | 40           | 3.15  | 3.43  | 2.71   | 0        |
| PUE-T-20HDF | 40           | 4.20  | 3.23  | 2.71   | 0        |
| PUE-T-25HDF | 40           | 5.25  | 3.03  | 2.71   | 0        |
| PUE-T-20SS  | 40           | 0     | 3.23  | 2.71   | 2.25     |

**Table S2:** The assignment of the deconvoluted subpeaks in the FTIR C=O absorption bands

| Peak position | peak position | Area percentage/% | Type       | H-bonded content/% |
|---------------|---------------|-------------------|------------|--------------------|
| PUE-TMP       | 1600          | -5.00546          | Ordered    | 70.7               |
|               | 1621          | -2.47449          | Ordered    |                    |
|               | 1682          | -14.13859         | Disordered |                    |
|               | 1717          | -49.16733         | Ordered    |                    |
|               | 1740          | -29.31414         | Free       |                    |
| PUE-T-20SS    | 1600          | -7.02999          | Ordered    | 80.8               |
|               | 1623          | -4.09519          | Ordered    |                    |
|               | 1703          | -29.18221         | Disordered |                    |
|               | 1725          | -40.1031          | Ordered    |                    |
|               | 1738          | -19.58952         | Free       |                    |
| PUE-T-20HDF   | 1600          | -2.72135          | Ordered    | 83.1               |
|               | 1678          | -39.63285         | Disordered |                    |
|               | 1711          | -40.67746         | Ordered    |                    |
|               | 1731          | -16.96834         | Free       |                    |

**Table S3:** Thermal Decomposition Parameters of PUE Materials

| Sample      | T <sub>5</sub> (°C) | Residual Carbon Rate (%) | Maximum Thermal Degradation Rate Temperature (°C) |
|-------------|---------------------|--------------------------|---------------------------------------------------|
| PUE-TMP     | 265                 | 3.53                     | 380.1                                             |
| PUE-T-20SS  | 296                 | 5.08                     | 413.6                                             |
| PUE-T-20HDF | 301                 | 4.38                     | 399.4                                             |

T<sub>5</sub> (°C): Temperature at which the sample loses 5% of its weight

**Table S4.** Damping Performance Parameters of PUE

| Sample      | Effective Damping         |                     | TA(K) |
|-------------|---------------------------|---------------------|-------|
|             | Temperature Range<br>(°C) | Tan $\delta_{\max}$ |       |
| PUE-TMP     | 38                        | 1.05                | 15.9  |
| PUE-T-5HDF  | 45                        | 1.18                | 18.1  |
| PUE-T-10HDF | 60                        | 1.15                | 20.8  |
| PUE-T-15HDF | 74                        | 1.25                | 23.1  |
| PUE-T-20HDF | 134                       | 1.38                | 44.2  |
| PUE-T-25HDF | 124                       | 1.32                | 34.3  |

**Table S5.** Mechanical Performance Parameters of PUE

| Sample      | Stress (MPa) | Strain (%) |
|-------------|--------------|------------|
| PUE-TMP     | 22.5         | 326        |
| PUE-T-5HDF  | 18.8         | 396        |
| PUE-T-10HDF | 19.5         | 489        |
| PUE-T-15HDF | 20.3         | 554        |
| PUE-T-20HDF | 19.1         | 626        |
| PUE-T-25HDF | 12.4         | 680        |
